1 **A distinct fingerprint of inflammatory mediators and miRNAs in**  
2 ***Plasmodium vivax* severe thrombocytopenia**

3

4 Marina L. S. Santos<sup>1</sup>, Roney S. Coimbra<sup>1</sup>, Tais N. Sousa<sup>1</sup>, Luiz F. F. Guimarães<sup>1</sup>,  
5 Matheus S. Gomes<sup>2</sup>, Laurence R. Amaral<sup>2</sup>, Dhelio B. Pereira<sup>3</sup>, Cor J. F. Fontes<sup>4</sup>,  
6 Ibrahim Hawwari<sup>5</sup>, Bernardo S. Franklin<sup>5\*</sup>, Luzia H. Carvalho<sup>1\*</sup>

7

8 <sup>1</sup> Instituto René Rachou, Fundação Oswaldo Cruz, FIOCRUZ, 30190-002, Belo  
9 Horizonte, MG, Brazil

10 <sup>2</sup> Laboratório de Bioinformática e Análises Moleculares, Rede Multidisciplinar de  
11 Pesquisa, Ciência e Tecnologia (RMPCT), Universidade Federal de Uberlândia (UFU)  
12 Campus Patos de Minas, 38700-002, Patos de Minas, MG, Brazil

13 <sup>3</sup> Centro de Pesquisas em Medicina Tropical (CEPEM), 76812-329, Porto Velho, RO,  
14 Brazil

15 <sup>4</sup> Departamento de Clínica Médica, Universidade Federal de Mato Grosso (UFMT),  
16 78060-900, Cuiabá, MT, Brazil

17 <sup>5</sup> Institute of Innate Immunity, Medical Faculty, University of Bonn, 53127, Bonn,  
18 NRW, Germany

19

20 \*Equal contribution; correspondence to LHC ([luzia.carvalho@fiocruz.br](mailto:luzia.carvalho@fiocruz.br)) and BSF  
21 ([franklin@uni-bonn.de](mailto:franklin@uni-bonn.de))

22

23

24

25

26

27

28

29 **Abstract**

30

31 **Background.** Severe thrombocytopenia can be a determinant factor in the morbidity of  
32 *Plasmodium vivax* (*Pv*), the most widespread human malaria. Although immune  
33 mechanisms may drive *Pv*-induced severe thrombocytopenia (PvST), the current data  
34 on the cytokine landscape in PvST is scarce, and often conflicting. The analysis of the  
35 bidirectional circuit of inflammatory mediators and miRNAs would lead to a better  
36 understanding of the mechanisms underlying PvST.

37 **Methods.** We combined Luminex proteomics, NanoString miRNA quantification, and  
38 machine learning, to evaluate an extensive array of plasma mediators in uncomplicated  
39 *Pv* patients, whose blood platelet counts varied from reference values to PvST.

40 **Results.** Unsupervised clustering analysis identified PvST-linked signatures comprised  
41 of both inflammatory (CXCL10, CCL4, and IL-18) and regulatory (IL-10, IL-1Ra,  
42 HGF) mediators. As part of PvST signatures, IL-6 and IL-8 were critical to discriminate  
43 *Pv* subgroups, while CCL2 and IFN- $\gamma$  from healthy controls. Supervised machine  
44 learning spotlighted IL-10 in *Pv*-mediated thrombocytopenia, and provided evidence for  
45 a potential signaling route involving IL-8 and HGF. Finally, we identified a set of  
46 miRNAs capable of modulating these signaling pathways.

47 **Conclusions.** The results place IL-10 and IL-8/HGF in the center of PvST and propose  
48 investigating these signaling pathways across the spectrum of malaria infections.

49

50 **Key words:** *Plasmodium vivax*, malaria, thrombocytopenia, biomarkers, miRNA,  
51 HGF, IL-10, IL-8, IL-6

52

53 **Running title:** *P. vivax*-driven severe thrombocytopenia

54

55

## 56 **Introduction**

57

58 *Plasmodium vivax* is the most widespread of the human malaria parasites, placing 3.3  
59 billion people at risk worldwide [1]. More recently, *P. vivax* (*Pv*) burden has been  
60 aggravated by growing evidence of its presence across all regions of Africa [2].  
61 Challenges to the control and elimination of *Pv* include its ability to relapse, its  
62 remarkable transmission efficiency, and low-density blood-stage infections, often  
63 undetected by routine surveillance [3].

64 It is currently a consensus that the virulence of *Pv* has been underestimated [4-  
65 6], particularly in the presence of co-morbidities [7]. While there are critical gaps in the  
66 current knowledge of *Pv* pathophysiology, it is well-established that vivax malaria is  
67 associated with a systemic inflammatory response [8], perhaps more intense than its  
68 counterpart *P. falciparum* [7, 9], which is more commonly associated with severe  
69 malaria. Findings suggest that tissue accumulation of *Pv* may occur, with the hidden  
70 biomass greatest in severe disease and capable of mediating systemic inflammatory  
71 response [10][11].

72 *Plasmodium vivax*-induced severe thrombocytopenia (PvST), characterized by  
73 blood platelet counts below 50,000 per mm<sup>3</sup>, is a common clinical complication in *Pv*  
74 malaria [12-14]. The mechanisms leading to PvST are unclear but may be related to  
75 platelet activation, consumption and/or phagocytosis [15] [16] [17].

76 Growing evidence strengthen an essential role of platelets as mediators of  
77 inflammation through their capacity to secrete numerous proteins upon activation or via  
78 their interaction with the endothelium, or with leukocytes [18]. For example, we have  
79 recently demonstrated that platelets enhance the inflammasome activity of innate  
80 immune cells and amplify IL-1-driven inflammation [19]. Therefore, it is possible to

81 speculate that platelets may be critical players in *Pv*-mediated systemic inflammatory  
82 response.

83         The role of platelets in malaria is complex and multifaceted [20]. While platelets  
84 can kill circulating parasites of all major human *Plasmodium* species through the release  
85 of platelet factor 4 (PF4 or CXCL4) [21], most studies indicate a predominantly  
86 deleterious role [22], which may involve the von Willebrand factor [23], the coagulation  
87 cascade [24], and the protein C pathway [25]. Additionally, studies involving controlled  
88 human *Pv* malaria infection (CHMI) suggested a link between platelets and endothelial  
89 activation, an essential pathogenic process in severe malaria [26].

90         Given the multifactorial mechanisms through which platelets can impact *Pv*  
91 malaria, we investigated here crucial factors and pathways that could underlie a  
92 fingerprint of PvST. For that, we measured the plasma concentrations of cytokines,  
93 chemokines, and growth factors in a cohort of *P. vivax* patients with varying degrees of  
94 thrombocytopenia. To gain additional insights into possibly perturbed regulatory  
95 pathways in PvST, we included a group of microRNAs (miRNAs), a class of small non-  
96 coding RNAs that regulate gene expression and seem to be critical to regulate platelet  
97 function [27]. By combining these highly sensitive methods with machine learning  
98 algorithms, we provide here essential insights into the interplay between inflammatory  
99 mediators, miRNAs, and *P. vivax*-induced severe thrombocytopenia.

100

## 101 **Patients and Methods**

102

### 103 **Study participants and sample collection**

104 Individuals who sought care at Brazilian malaria reference healthcare facilities in  
105 endemic areas of the Amazon Region and presented *Pv*-positive thick blood smear were  
106 invited to participate in the study. Exclusion criteria consisted of: (i) refusal to provide

107 written informed consent; (ii) age below 17 years; (iii) self-reported pregnancy; (iv)  
108 mixed malaria infections (PCR-based assays); and (v) any other traceable co-  
109 morbidities. Upon enrolment, we used a standardized questionnaire to record  
110 demographical, epidemiological, clinical and hematological data. Seventy-seven  
111 symptomatic uncomplicated *Pv* patients, with a median age of 39 years and a proportion  
112 male: female of 4.5: 1, were enrolled in the study ([Supplementary Table 1](#)). The  
113 interquartile range of parasitaemia was 1,900 to 7,380 parasites per mm<sup>3</sup>, with anaemia  
114 present in 25 (32%) of *Pv* patients. Fifty-four (70%) patients present thrombocytopenia  
115 (i.e., platelets below 150,000/mm<sup>3</sup>), with 9 (12%) of them classified as severe  
116 thrombocytopenia (platelets below 50,000/mm<sup>3</sup>), with no evidence of bleeding.  
117 Peripheral blood sample (5 mL in EDTA) was collected for each individual; plasma  
118 samples were immediately obtained after blood sampling (1,500 × g for 15 min at room  
119 temperature) and stored at -80°C until use. Additionally, plasma samples from nine  
120 age-matched non-infected healthy adult from the same endemic areas were collected as  
121 described above.

122 The methodological aspects of this study were approved by the Ethical  
123 Committee of Research on Human Beings from the René Rachou Institute – Fiocruz  
124 Minas (protocols # 05/2008 and # 80235017.4.0000.5091), according to the Brazilian  
125 National Council of Health. The study participants were informed about the aims and  
126 procedures and agreed with voluntary participation through written informed consent.

127

### 128 **Multiplex determination of inflammatory mediators**

129 The plasma concentrations of 45 cytokines/chemokines/growth factors were measured  
130 with the ProcartaPlex® 45-Plex Human array (eBioscience, USA) using Luminex®  
131 xMAP technology (MAGPIX, Thermo Fisher Scientific, USA), as recommended.

132

### 133 **Plasma RNA extraction and confirmation by real time PCR**

134 Circulating and exosomal RNA were purified from 400  $\mu$ L of plasma using  
135 Plasma/Serum Circulating and Exosomal RNA Purification kit (Norgen Biotek Corp.,  
136 Canada), according to manufacturer instructions. In order to control extraction  
137 efficiency, a panel contained 5 spiked in probes (ath-miR-159a, cel-miR-248, cel-miR-  
138 254, osa-miR-414, osa-miR-442; IDT Technologies, USA) was added after second lysis  
139 buffer incubation. After purification, RNA portion was concentrated using RNA Clean-  
140 Up and Concentration kit (Norgen Biotek Corp., Canada), following manufacturer  
141 instructions. As a control of the RNA extraction, samples were amplified for the U6  
142 (RNU6-1) snRNA by using TaqMan<sup>®</sup> MicroRNA Reverse Transcription kit, followed  
143 by qPCR amplification using QuantStudio 6 Flex (Applied Biosystems, USA),  
144 according to fabricant's protocol. The U6 snRNA was successfully detected (data not  
145 shown).

146

### 147 **Analysis of microRNA (miRNA) expression**

148 Detection of the miRNA was performed using NanoString nCounter technology (USA),  
149 according to manufacturer's protocol. The Human v3 miRNA CodeSet allowed  
150 multiplex assessment of 800 miRNAs by specific molecular barcodes. Raw data was  
151 analysed with NanoString nSolver 4.0, using default quality control standards. For  
152 normalization, spike in oligos (cel-miR-248 and cel-miR-254) were used. Following  
153 manufacturer's instructions, only targets that presented average raw count above 100  
154 were considered for further differential expression analysis in Partek Genomics Suite  
155 7.0. Principal component analysis plot was also generated with the same software with

156 batch effects removed. Targets presenting fold change equal or above 1.25 ( $p < 0.05$ )  
157 were considered differentially expressed.

158

## 159 **Data analysis**

160 Differences in medians were tested using Mann-Whitney test or Kruskal-Wallis test, as  
161 appropriated. Correlation between variables was assessed by using either Pearson's or  
162 Spearman's (rank) correlation (GraphPad Prism 7, San Diego, CA, USA) at significance  
163 level of 5%. The ensemble of inflammatory mediators differentially expressed in the  
164 study population was identified with the algorithm Comparative Marker Selection (fold  
165 change  $\geq 1.5$ , Bonferroni  $p \leq 0.05$ ) followed by hierarchical clustering (Spearman's  
166 correlation, average linkage) using the GenePattern platform (Broad Institute, MIT,  
167 USA). The independent association between inflammatory mediator and the number of  
168 platelets was evaluated by adjusting a negative binomial (NB) regression model with  
169 stepwise backward deletion. NB regression analysis was performed using the statistical  
170 package Stata version 12 (Stata Corp., Texas, USA). Covariates were selected for  
171 inclusion in the regression models if they were associated with the outcome at the 15%  
172 level of significance according to the exploratory unadjusted analysis. Associations with  
173  $p$  values  $< 0.05$  were considered significant. Decision trees were used to select the  
174 minimal set of phenotypic features that efficiently segregated groups. The J48 method,  
175 present in Weka software (Waikato Environment for Knowledge Analysis, version  
176 3.6.11, University of Waikato, New Zealand), was used for decision tree construction.  
177 The Leave-one-out cross-validation (LOOCV) was calculated to estimate the accuracy  
178 of the generated model. Functional enrichment analysis of the miRNAs targets with  
179 experimental evidences was performed with Ingenuity Pathway Analysis (IPA)  
180 (Qiagen) with default parameters.

181

## 182 **Results**

### 183 **A cytokine/chemokine signature for *P. vivax*-induced severe thrombocytopenia**

184 To acquire a reliable assessment of the landscape of circulating cytokines/chemokines  
185 in *P. vivax* malaria, we used high throughput Luminex cytokine arrays to profile the  
186 concentrations of 45 human proteins (cytokines, chemokines, and growth factors) in the  
187 plasma of *P. vivax* patients (Supplementary Table 1). As baseline comparison, we  
188 included plasma from nine age-matched healthy volunteers from the same localities. We  
189 found significantly altered plasma concentrations of 15 proteins in *Pv* patients compared  
190 to healthy donors (Supplementary Figure 1A). Notably, several proteins in plasma from  
191 *Pv* patients correlated with blood platelet counts (Supplementary Figure 1B, and Figure  
192 1). Except for IL-1 $\beta$  and bNGF, the correlation for all other proteins was negative  
193 (Supplementary Figure 1), suggesting an involvement of these proteins in the  
194 pathogenesis of *P. vivax* associated with severe thrombocytopenia (PvST).

195 To gain additional insights into the relationship between circulating  
196 inflammatory mediators and PvST, we applied hierarchical clustering, an unsupervised  
197 machine learning algorithm, to investigate patterns of plasma proteins that could  
198 reliably report PvST. From all the cytokines that showed correlations with platelet  
199 counts (Figure 1 and Supplementary Figure 1B), this analysis highlighted eight proteins  
200 (CXCL10, CCL2, CCL4, IL-10, IL-1Ra, IFN- $\gamma$ , IL-18, and HGF) as part of a specific  
201 PvST signature, as compared to unexposed healthy controls (Figure 2A). When we  
202 stratified *Pv* patients into subgroups with severe thrombocytopenia or non-  
203 thrombocytopenia, this analysis additionally identified IL-8 and IL-6, but not IFN- $\gamma$  and  
204 CCL2 among the eight proteins found in the former comparison (Figure 2B). Using a  
205 multivariate regression analysis, we excluded the effect of possible confounding factors,



206 such as *Pv* parasitic density, hemoglobin concentrations and WBC counts. Notably, the  
207 following mediators linked to PvST remained independently associated with platelet  
208 counts in *Pv* patients: IL-8 ( $\beta = -0.0072$ ;  $p = 0.006$ ), IL-10 ( $\beta = -0.0009$ ;  $p = 0.005$ ), HGF  
209 ( $\beta = -0.0026$ ;  $p < 0.001$ ), and CCL2 ( $\beta = -0.0005$ ;  $p = 0.006$ ).

210 Next, we employed supervised machine learning to the complete dataset to  
211 generate decision trees that could highlight key markers that predict severe  
212 thrombocytopenia from possible noise of other mediators. From all inflammatory  
213 mediators analyzed, the J48 algorithm generated best-fit decision trees that highlighted  
214 (i) IL-10 to discriminate healthy controls from PvST (Figure 2C) and (ii) IL-8, HGF,  
215 and IL-7 to discriminate PvST from non-thrombocytopenic patients (Figure 2D).  
216 Notably, inclusion of additional biomarkers did not result in an appreciable increase in  
217 classification accuracy. Altogether, these findings reveal a panel composed of IL-  
218 8/HGF/IL-7 and IL-10 in the center of PvST.

219

## 220 **A signature of miRNAs for *P. vivax*-induced severe thrombocytopenia**

221 MicroRNAs (miRNAs) are well-known regulators of cytokine expression. To gain an  
222 additional layer on the mechanisms driving PvST, we used a highly sensitive molecular  
223 barcode NanoString approach to examine the miRNA profile of a representative subset  
224 of the studied population. The samples were comprised of 26 age-matched *P. vivax*  
225 patients, selected based on their blood platelet counts (as none, moderate, or severe  
226 thrombocytopenia), as well as healthy individuals, as baseline controls. Malaria patients  
227 and healthy individuals clustered into different expression ellipses in the principal  
228 component analysis (Figure 3A), which explained 74% of the variation in the dataset.  
229 While we detected 17 out of 800 miRNAs in *P. vivax* plasma, only six of them differed  
230 between subgroups of *P. vivax* patients or healthy controls (Figure 3B). Within the

231 differentially expressed miRNA between *P. vivax* patients and controls we found that  
232 the miRNA pair hsa-miR-4454/hsa-miR-7975 was upregulated (1.957 fold,  $p = 0.0434$ )  
233 while three other miRNAs were downregulated ( $< 1.5$ -fold) in *P. vivax* patients (Figure  
234 3B).

235 The pair hsa-miR-4454/hsa-miR-7975 was additionally significantly increased  
236 in patients with severe thrombocytopenia compared to other infections (none, or  
237 moderate thrombocytopenia) (Figure 3B). The miRNA hsa-miR-122-5p showed the  
238 highest expression levels in PvST patients compared to patients with moderate  
239 thrombocytopenia, but this difference was not significant when compared to non-  
240 thrombogenic patients. Together, these findings highlight these miRNAs as associated  
241 with PvST. Supporting these findings, a correlation between the miRNA levels detected  
242 by NanoString and the blood platelet counts in these 26 patients confirmed that platelet  
243 counts are negatively associated with plasma levels of miRNAs (Figure 3C).  
244 Importantly, plasma miRNA levels did not show significant correlations with other  
245 blood parameters (data not shown).

246 In parallel, the expression of all but one miRNA linked to PvST increased  
247 alongside the plasmatic concentration of cytokines, chemokines and growth factor  
248 (Supplementary Figure 2), which were highlighted as part of a signature for PvST  
249 (Figure 2). Lastly, data analysis of miRNA expression confirmed that the set of  
250 miRNAs identified here are involved in key canonical pathways related to the signature  
251 of PvST, including the signaling of IL-6, IL-7, IL-8/CXCL8, interferon and IL-10  
252 (Supplementary Table 2). Additionally, signaling pathways related to several stages of  
253 the inflammatory process and immune response were also identified.

254 Finally, the profile of the 17 miRNAs that were detected in plasma samples of  
255 the studied subjects generated accurate decision trees based on a single miRNA for

256 severe thrombocytopenia versus healthy controls (has-miR-4454/has-miR-7975) (Figure  
257 4A), or non-thrombocytopenic *P. vivax* infections (has-miR-150-5p) (Figure 4B).  
258 Together, our findings provide an intricate relationship between key  
259 cytokines/chemokines with their regulatory miRNAs in *P. vivax* malaria that may be  
260 useful to define PvST.

261

## 262 Discussion

263

264 Scarce, fragmented, and occasionally conflicting data are available on the  
265 cytokine/chemokine network in PvST [14, 16, 28, 29]. Here, we hypothesize that the  
266 combined analysis of circulating proteins and miRNAs could provide a more realistic  
267 portrait of PvST. We, therefore, examined an extensive array of soluble plasma factors  
268 in a cohort of *Pv* patients, whose most prominent hematological alteration was blood  
269 platelet counts, which varied from normal ranges ( $\geq 150 \times 10^3/\text{mm}^3$ ) to severe  
270 thrombocytopenia ( $< 50 \times 10^3/\text{mm}^3$ ). As expected, no bleeding was reported in our  
271 patients, suggesting that megakaryocytes were able to release mega platelets in the  
272 circulation to compensate for the low absolute number of platelets in the periphery [15].  
273 In accordance, we found that the mean platelet volume (MPV), a measurement of the  
274 platelet size that increases according to platelet destruction, correlated negatively with  
275 the platelet counts ( $r = -0.5426$ ,  $p = 0.0002$ ).

276 For the detection of soluble plasma mediators, we used a Luminex-based  
277 technology that is highly reproducible compared to conventional cytokine bead arrays  
278 [30]. The hierarchical clustering of samples allowed us to define two panels comprised  
279 of inflammatory and regulatory mediators that discriminated PvST from health controls  
280 or non-thrombocytopenic patients (Supplementary Table 3). Although the same

281 regulatory mediators (IL-10/IL-1Ra/HGF) were included in both panels, decision trees  
282 confirmed the levels of IL-10 as critical to classify PvST as compared with controls.  
283 Previous studies supported a similar association between IL-10 and decreased blood  
284 platelet counts [14, 16, 28, 29].

285 High levels of IL-10 are commonly observed in *Pv* infections and are primarily  
286 associated with the immune system's effort to counteract excessive inflammation [31].  
287 This oversimplified association of IL-10 with less severe vivax disease has been  
288 challenged by studies that reported a lack of correlation between regulatory cytokines  
289 and milder symptoms. On the contrary, high levels of IL-10 are linked to intense  
290 paroxysms [32], increased disease-severity [33], parasite-related inflammation [10],  
291 and the occurrence of recrudescence of blood-stage infections [34]. Although previous  
292 studies highlight that IL-10 has complex and not well-characterized functions in *P.*  
293 *vivax* pathogenesis [10], our findings strengthen this cytokine's critical contribution in  
294 *P. vivax*-induced thrombocytopenia.

295 In addition to IL-10, our analysis identified IL-1Ra as associated with *Pv*-severe  
296 thrombocytopenia. IL-1Ra is a naturally occurring member of the IL-1 family that binds  
297 to IL-1 receptors and antagonizes IL-1 $\alpha$ /IL-1 $\beta$  [35]. Notably, IL-10 is a potent inducer  
298 of IL-1Ra, which may represent a mechanism whereby IL-10 exerts its anti-  
299 inflammatory effects [36]. Interestingly, the decision tree further indicated HGF as  
300 strongly associated with PvST, particularly to differentiate subgroups of *P. vivax*  
301 patients. HGF exerts potent anti-inflammatory effects, which seem to involve a  
302 signaling cascade leading to increased expression of IL-1Ra [37]. In agreement with the  
303 upregulation of IL-1Ra in thrombocytopenic patients, we recently demonstrated that  
304 low platelet counts in *Pv* malaria are associated with a progressive decrease in plasma  
305 concentrations of IL-1 $\beta$  [19]. While IL-1Ra in *Pv* infections has been little explored,

306 elevated IL-1Ra levels have been associated with increased disease severity in *P.*  
307 *falciparum* malaria-infected children [38]. These findings suggest that an excessive anti-  
308 inflammatory response may dampen the necessary inflammatory response able to  
309 control the infection [39].

310 Combined with the abovementioned regulatory mediators, the panels capable of  
311 differentiating PvST from other subgroups included well-known inflammatory  
312 mediators ([Supplementary Table 3](#)). A range of different cell types produces these  
313 cytokines/chemokines, which account for the cascade of events that lead to leukocytes  
314 recruitment, trafficking, and amplification of inflammation and *Pv* pathogenesis [8, 10,  
315 40]. Interestingly, the up-regulation of IL-6 and IL-8 was critical to discriminate  
316 subgroups of vivax patients, but not from healthy subjects. IL-6 has an established role  
317 in *Pv* infection, particularly as a marker of systemic inflammation leading to organ  
318 dysfunction and disease severity [10]. The same authors demonstrated associations  
319 between a decreased activity of plasma ADAMTS13 (a von Willebrand factor cleaving  
320 protease), lower platelet counts, and increased concentrations of IL-6, a well-known  
321 specific inhibitor of ADAMTS13.

322 An unexpected finding was the potential involvement of IL-8 in PvST, further  
323 validated by the decision trees. IL-8, whose expression is induced by Toll-like receptor  
324 (TLR) and IL-1R-stimulated-NF- $\kappa$ B signaling, is a key mediator of neutrophil  
325 recruitment [41]. Though IL-8 has been largely underestimated in *P. vivax* infection, a  
326 previous study noticed impaired chemotaxis of neutrophils towards an IL-8 gradient,  
327 suggesting a possible mechanism for secondary bacterial infection during *Pv* malaria  
328 [42]. On the other hand, earlier studies on *P. falciparum* have reported elevated IL-8  
329 levels in patients suffering from severe disease [43, 44]. Although IL-8-mediated  
330 thrombocytopenia has not been investigated in malaria, a significant body of evidence

331 suggests its involvement in platelet production, destruction, and/or activation [45-48].

332           While the mechanism of IL-8 induced PvST is not known, our study identified a  
333 potential route involving HGF. Notably, HGF binds to cMet (a receptor tyrosine kinase)  
334 to regulate IL-8 expression [49]. HGF itself has been reported to affect the proliferation  
335 and differentiation of hemopoietic stem and progenitor cells [50]. Intriguingly, a variant  
336 beta-chain of HGF forms a molecular complex with IL-7, and this naturally occurring  
337 hybrid cytokine IL-7/HGF $\beta$  exerts a potent influence on primitive hematopoietic cells  
338 [51]. In the current study, the plasma levels of circulating IL-7 (a growth factor for  
339 lymphocytes) were close to the detection limits of the assay (average 4 pg/mL), which  
340 precluded definitive conclusions about its involvement in PvST; even though the  
341 decision tree algorithm identified IL-7 as useful to classify a small part of *Pv* patients.  
342 Despite that, reduced peripheral levels of IL-7 have been associated with inefficient  
343 erythropoietic responses in *P. falciparum*-induced severe anemia [52]. Unfortunately,  
344 no data related to blood platelet counts were available in the abovementioned pediatric  
345 study. In our study, anemia was not a confounding factor as (i) multivariate regression  
346 analysis confirmed that hemoglobin levels were not a confounding factor for the  
347 association between plasma concentrations of IL-8 and HGF and peripheral platelet  
348 counts (ii) the majority of enrolled patients does not present anemia. Collectively, our  
349 results suggest that a mechanism involving the upregulation of IL-8 and HGF is  
350 involved in PvST. . The potential contribution of the downregulation of IL-7 should be  
351 further confirmed.

352           Considering that cytokines/chemokines are among the most relevant proteins  
353 whose expression is regulated by miRNAs [53], we further identify key regulatory  
354 miRNAs that could be involved with the inflammatory profile of PvST. Remarkably, a  
355 set of six miRNAs were differentially expressed between PvST patients and other

356 subgroups (non-thrombocytopenic or healthy controls), with the expression levels of all  
357 but one miRNA increasing with the circulating levels of strategic mediators such as IL-  
358 6, IL-8, IL-10, and HGF.

359         It is noteworthy that platelet-derived microparticles are transport vehicles for  
360 large numbers of miRNAs [54]. Among the miRNAs linked to PvST, we detected  
361 platelet-related miRNAs (e.g., miR-126-3p and miR-150-5p), which are known to  
362 mediate platelet function and reactivity [54, 55]. This is a relevant observation as we  
363 have previously demonstrated that platelets are major sources of circulation  
364 microvesicles in *Pv* malaria [56] and that thrombocytopenia strongly correlates with  
365 levels of circulating nucleic acids [57]. Lastly, the set of miRNAs identified here were  
366 involved in key canonical pathways related to the signature of PvST, including the  
367 signaling of IL-6, interferon, IL-8 and IL-10. Interestingly, the same set of miRNA  
368 identified the signaling of IL-17A (IL-17, a key component of innate and adaptive  
369 immunity) as associated with PvST. Notwithstanding, the plasma levels of IL-17A in  
370 our *Pv* patients did not correlate with platelet counts. Perhaps IL-17A plays a more  
371 complex role in the cascade of events that lead to PvST. IL-17A signaling mediates the  
372 production of chemokines/cytokines such as IL-8, CCL2 and IL-6 [58], which were  
373 associated with PvST in our analysis. Altogether, these findings are relevant, as the  
374 miRNA profile in *P. vivax* remains poorly explored.

375         This study has limitations that should be considered when interpreting the  
376 results. First, our study included a relatively small number of participants, which may  
377 have underpowered some of the statistical analyses. Second, the multivariate model  
378 used to control confounding variables was restricted to a small number of participants,  
379 which may have excluded cytokines that could be independently associated with  
380 platelets. Despite this limitation, key mediators such as IL-10, IL-8, and HGF were

381 clearly identified as independently associated with platelet counts. Third, one single  
382 time-point sampling is unlikely to provide insights into the sequence of events from  
383 different levels of thrombocytopenia to the progression of clinical disease.  
384 Notwithstanding, the direction of the associations with severe thrombocytopenia  
385 revealed structural patterns in such data sets that allowed us to identify novel candidate  
386 cytokines/chemokine patterns that may be critical for PvST. Notably, our analysis  
387 highlighted key core markers such as IL-8 and HGF as potential, and unexplored,  
388 signaling routes involving platelets and *Pv* malaria infection. Finally, we provide  
389 evidence for an unprecedented role of the HGF signaling in a regulatory pathway  
390 involving IL-10/ IL-1Ra. Coherently, this study identified a set of miRNAs capable of  
391 modulating these vital chemokine/cytokine pathways, which should be investigated in  
392 the context of thrombocytopenia across the spectrum of malaria infections.

393



## 394 **Acknowledgments**

395

396 We thank malaria patients and healthy controls for participation in the study; the local  
397 malaria control team in Porto Velho (RO) and Cuiabá (MT) for their logistic support;  
398 Lucas Secchim Ribeiro for fruitful discussions and Cornelia Rohland for sample  
399 shipment; the Programme for Technological Development in Tools for Health-PDTIS-  
400 FIOCRUZ for use of the Real-Time PCR (RPT09D) facilities; the Coordination for the  
401 Improvement of Higher Education Personnel (CAPES) and the Program for Institutional  
402 Internationalization of CAPES-PrInt / FIOCRUZ is also acknowledged .

403

## 404 **Figure Legends**

405 **Figure 1.** Spectrum of plasma mediators in *P. vivax* infection. Luminex Cytokine plex  
406 of cytokines, chemokines and growth factors measured in the plasma of *P. vivax*  
407 patients. Patients were stratified according to their blood platelet counts as severe (<  
408 50,000 mm<sup>3</sup>) or moderate (50,000 – 150,000 mm<sup>3</sup>) thrombocytopenia, and non-  
409 thrombopenic ( $\geq$  150,000 mm<sup>3</sup>). For each boxplot, median and interquartile ranges  
410 were represented as transversal lines in the center and lower/upper bounds of the box,  
411 respectively, with whiskers the minimum and maximum values. P values for Kruskal-  
412 Wallis multiple comparisons are shown.

413

414 **Figure 2.** Identifying a cytokine/chemokine signature for *P. vivax* patients with severe  
415 thrombocytopenia (PvST). A-B, Agglomerative hierarchical clustering showed key  
416 cytokines that could distinguish PvST (blue circles) from (A) healthy donors (green  
417 circles), or (B) non-thrombopenic patients (NT, yellow circles). Data were represented  
418 as heatmap of clustered proteins (rows) and individual plasma samples (column), with

419 minimum and maximum normalized levels showed in blue and red scales, respectively.  
420 Hierarchical clustering was performed based on Spearman's correlation coefficient,  
421 using the average linkage method (GenePattern, Broad Institute). *C-D*, Best-fit decision  
422 trees generated with the J48 algorithm (Weka software) identified IL-10 (*C*) and IL-  
423 8/HGF/IL7 (*D*) as minimum mediations that efficiently segregated PvST from healthy  
424 controls (HD) and from non-thrombocytopenic patients (NT), respectively. Weighted of  
425 the attribute (plasma levels) were placed in the root of the tree according to the  
426 cytokine/chemokine value (pg/mL) that best divided groups. The total of classified  
427 registers (correct and incorrect) for each class are given in parentheses for each terminal  
428 node with the Full training (FULL) and Leave-one-out cross-validation (LOOCV)  
429 accuracies. If incorrectly classified registers exist, they will appear after slash "/".

430

431 **Figure 3.** The profile of circulating miRNAs in *P. vivax* patients. *A*, Principal  
432 component analysis of the distribution of miRNAs detected in the plasma of a subgroup  
433 of *P. vivax* patients (red, n = 26) and healthy donors (blue, n = 8); *B*, Six miRNAs  
434 were differentially expressed in groups of *P. vivax* patients and healthy subjects, with  
435 positive values of fold change (FC) highlighted in red and negative values in green,  
436 considering  $p < 0.05$ . *P. vivax* patients were stratified according to their blood platelet  
437 counts as: severe ( $< 50,000 \text{ mm}^3$ ) or moderate ( $50,000$  to  $150,000 \text{ mm}^3$ )  
438 thrombocytopenia, and non-thrombocytopenic patients ( $\geq 150,000 \text{ mm}^3$ ); *C*,  
439 Correlations between plasma miRNA levels and blood platelet counts in *P. vivax*  
440 patients from *A*. Correlation coefficients and *P*. values are shown.

441

442 **Figure 4 – Decision trees for the miRNAs linked to *P. vivax* severe**  
443 **thrombocytopenia**

444 Accurate decision trees generated with the J48 algorithm (Weka software) identified  
445 has-miR-4454/has-miR-7975 (*A*) and has-miR-150-5p (*D*) as minimum miRNA that  
446 efficiently segregated PvST (ST) from health controls (HC) and from non-  
447 trombocytopenic patients (NT), respectively. Weighted of the attribute (miRNA) were  
448 placed in the roof of the tree according to the miRNA value (counts) that best divided  
449 groups. The total of classified registers (correct and incorrect) for each class are given in  
450 parentheses for each terminal node with the Full training (FULL) and Leave-one-out  
451 cross-validation (LOOCV) accuracies. If incorrectly classified registers exist, they will  
452 appear after slash "/"  
453

454

455 **Notes**

456

457 **Authorship.** Conception and study design: LHC and BSF. Fieldwork and recruitment  
458 of participants: MLSS, CJFF, DBP. Performance of experiments: MLSS and IH. Data  
459 analysis: MLSS, IH, TNS, CJFF, LHC, BSF. Bioinformatics analysis: RSC, MSG,  
460 LRA. The drafting of the manuscript: LHC and BSF. All authors critically revised the  
461 manuscript and approved the final version.

462

463 **Funding.** This work was supported by the European Research Council (PLAT-IL-1,  
464 714175 to BSF); the National Research Council for Scientific and Technological  
465 Development-CNPq (LHC); the Research Foundation of Minas Gerais- FAPEMIG  
466 (LHC). BSF was further supported by the Germany's Excellence Strategy (EXC 2151 –  
467 390873048) from the Deutsche Forschungsgemeinschaft (DFG, German Research  
468 Foundation to BSF). The fellowships were sponsored by CNPq (MLSS, CJFF, TNS,  
469 and LHC), and by the Brazil-Germany Program of Cooperation -  
470 CNPq/CAPES/DAAD (MLSS).

471

472 **Potential conflict of interest.** The authors do not have a commercial or other  
473 association that might pose a conflict of interest.

474

475

476

477 **References**

478

- 479 1. Battle KE, Lucas TCD, Nguyen M, et al. Mapping the global endemicity and  
480 clinical burden of Plasmodium vivax, 2000-17: a spatial and temporal modelling study.  
481 Lancet **2019** ; 394(10195):332-43.
- 482 2. Twohig KA, Pfeffer DA, Baird JK, et al. Growing evidence of Plasmodium vivax  
483 across malaria-endemic Africa. PLoS Negl Trop Dis **2019** ; 13(1):e0007140.
- 484 3. Price RN, Commons RJ, Battle KE, Thriemer K, Mendis K. Plasmodium vivax in  
485 the Era of the Shrinking P. falciparum Map. Trends Parasitol **2020** ; 36(6):560-70.
- 486 4. Tjitra E, Anstey NM, Sugiarto P, et al. Multidrug-resistant Plasmodium vivax  
487 associated with severe and fatal malaria: a prospective study in Papua, Indonesia. PLoS  
488 Med **2008** ; 5(6):e128.
- 489 5. Lacerda MV, Fragoso SC, Alecrim MG, et al. Postmortem characterization of  
490 patients with clinical diagnosis of Plasmodium vivax malaria: to what extent does this  
491 parasite kill? Clin Infect Dis **2012** ; 55(8):e67-74.
- 492 6. Douglas NM, Pontororing GJ, Lampah DA, et al. Mortality attributable to  
493 Plasmodium vivax malaria: a clinical audit from Papua, Indonesia. BMC Med **2014** ;  
494 12:217.
- 495 7. Anstey NM, Douglas NM, Poespoprodjo JR, Price RN. Plasmodium vivax: clinical  
496 spectrum, risk factors and pathogenesis. Adv Parasitol **2012** ; 80:151-201.
- 497 8. Antonelli LR, Junqueira C, Vinetz JM, Golenbock DT, Ferreira MU, Gazzinelli RT.  
498 The immunology of Plasmodium vivax malaria. Immunol Rev **2020** ; 293(1):163-89.

- 499 9. Yeo TW, Lampah DA, Tjitra E, et al. Greater endothelial activation, Weibel-  
500 Palade body release and host inflammatory response to Plasmodium vivax, compared  
501 with Plasmodium falciparum: a prospective study in Papua, Indonesia. *J Infect Dis* **2010**  
502 ; 202(1):109-12.
- 503 10. Barber BE, William T, Grigg MJ, et al. Parasite biomass-related inflammation,  
504 endothelial activation, microvascular dysfunction and disease severity in vivax malaria.  
505 *PLoS Pathog* **2015** ; 11(1):e1004558.
- 506 11. Goncalves RM, Lima NF, Ferreira MU. Parasite virulence, co-infections and  
507 cytokine balance in malaria. *Pathog Glob Health* **2014** ; 108(4):173-8.
- 508 12. Martinez-Salazar EL, Tobon-Castano A. Platelet profile is associated with clinical  
509 complications in patients with vivax and falciparum malaria in Colombia. *Rev Soc Bras*  
510 *Med Trop* **2014** ; 47(3):341-9.
- 511 13. Naing C, Whittaker MA. Severe thrombocytopenia in patients with vivax  
512 malaria compared to falciparum malaria: a systematic review and meta-analysis. *Infect*  
513 *Dis Poverty* **2018** ; 7(1):10.
- 514 14. Punnath K, Dayanand KK, Chandrashekar VN, et al. Association between  
515 Inflammatory Cytokine Levels and Thrombocytopenia during Plasmodium falciparum  
516 and P. vivax Infections in South-Western Coastal Region of India. *Malar Res Treat* **2019**  
517 ; 2019:4296523.
- 518 15. Lacerda MV, Mourao MP, Coelho HC, Santos JB. Thrombocytopenia in malaria:  
519 who cares? *Mem Inst Oswaldo Cruz* **2011** ; 106 Suppl 1:52-63.
- 520 16. Coelho HC, Lopes SC, Pimentel JP, et al. Thrombocytopenia in Plasmodium vivax  
521 malaria is related to platelets phagocytosis. *PLoS One* **2013** ; 8(5):e63410.

- 522 17. Essien EM, Emagha UT. Blood platelet: a review of its characteristics and  
523 function in acute malaria infection. *Afr J Med Med Sci* **2014** ; 43(4):287-94.
- 524 18. Ribeiro LS, Migliari Branco L, Franklin BS. Regulation of Innate Immune  
525 Responses by Platelets. *Front Immunol* **2019** ; 10:1320.
- 526 19. Rolfes V, Ribeiro LS, Hawwari I, et al. Platelets Fuel the Inflammasome  
527 Activation of Innate Immune Cells. *Cell Rep* **2020** ; 31(6):107615.
- 528 20. O'Sullivan JM, O'Donnell JS. Platelets in malaria pathogenesis. *Blood* **2018** ;  
529 132(12):1222-4.
- 530 21. Kho S, Barber BE, Johar E, et al. Platelets kill circulating parasites of all major  
531 Plasmodium species in human malaria. *Blood* **2018** ; 132(12):1332-44.
- 532 22. Gramaglia I, Velez J, Combes V, Grau GE, Wree M, van der Heyde HC. Platelets  
533 activate a pathogenic response to blood-stage Plasmodium infection but not a  
534 protective immune response. *Blood* **2017** ; 129(12):1669-79.
- 535 23. de Mast Q, Groot E, Lenting PJ, et al. Thrombocytopenia and release of  
536 activated von Willebrand Factor during early Plasmodium falciparum malaria. *J Infect*  
537 *Dis* **2007** ; 196(4):622-8.
- 538 24. Francischetti IM, Seydel KB, Monteiro RQ. Blood coagulation, inflammation,  
539 and malaria. *Microcirculation* **2008** ; 15(2):81-107.
- 540 25. Turner L, Lavstsen T, Berger SS, et al. Severe malaria is associated with parasite  
541 binding to endothelial protein C receptor. *Nature* **2013** ; 498(7455):502-5.
- 542 26. Woodford J, Yeo TW, Piera KA, et al. Early Endothelial Activation Precedes  
543 Glycocalyx Degradation and Microvascular Dysfunction in Experimentally Induced  
544 Plasmodium falciparum and Plasmodium vivax Infection. *Infect Immun* **2020** ; 88(5).

- 545 27. Stojkovic S, Nossent AY, Haller P, et al. MicroRNAs as Regulators and  
546 Biomarkers of Platelet Function and Activity in Coronary Artery Disease. *Thromb*  
547 *Haemost* **2019** ; 19(10):1563-72.
- 548 28. Park JW, Park SH, Yeom JS, et al. Serum cytokine profiles in patients with  
549 *Plasmodium vivax* malaria: a comparison between those who presented with and  
550 without thrombocytopenia. *Ann Trop Med Parasitol* **2003** ; 97(4):339-44.
- 551 29. Raza A, Khan MS, Ghanchi NK, Raheem A, Beg MA. Tumour necrosis factor,  
552 interleukin-6 and interleukin-10 are possibly involved in *Plasmodium vivax*-associated  
553 thrombocytopaenia in southern Pakistani population. *Malar J* **2014** ; 13:323.
- 554 30. Richens JL, Urbanowicz RA, Metcalf R, Corne J, O'Shea P, Fairclough L.  
555 Quantitative validation and comparison of multiplex cytokine kits. *J Biomol Screen*  
556 **2010** ; 15(5):562-8.
- 557 31. Andrade BB, Reis-Filho A, Souza-Neto SM, et al. Severe *Plasmodium vivax*  
558 malaria exhibits marked inflammatory imbalance. *Malar J* **2010** ; 9:13.
- 559 32. Goncalves RM, Scopel KK, Bastos MS, Ferreira MU. Cytokine balance in human  
560 malaria: does *Plasmodium vivax* elicit more inflammatory responses than *Plasmodium*  
561 *falciparum*? *PLoS One* **2012** ; 7(9):e44394.
- 562 33. Raza A, Ghanchi NK, Sarwar Zubairi A, Raheem A, Nizami S, Beg MA. Tumor  
563 necrosis factor -alpha, interleukin-10, intercellular and vascular adhesion molecules  
564 are possible biomarkers of disease severity in complicated *Plasmodium vivax* isolates  
565 from Pakistan. *PLoS One* **2013** ; 8(12):e81363.
- 566 34. Chaves YO, da Costa AG, Pereira ML, et al. Immune response pattern in  
567 recurrent *Plasmodium vivax* malaria. *Malar J* **2016** ; 15(1):445.



- 568 35. Arend WP, Malyak M, Guthridge CJ, Gabay C. Interleukin-1 receptor antagonist:  
569 role in biology. *Annu Rev Immunol* **1998** ; 16:27-55.
- 570 36. Tamassia N, Castellucci M, Rossato M, et al. Uncovering an IL-10-dependent NF-  
571 kappaB recruitment to the IL-1ra promoter that is impaired in STAT3 functionally  
572 defective patients. *FASEB J* **2010** ; 24(5):1365-75.
- 573 37. Molnar C, Garcia-Trevijano ER, Ludwiczek O, et al. Anti-inflammatory effects of  
574 hepatocyte growth factor: induction of interleukin-1 receptor antagonist. *Eur Cytokine*  
575 *Netw* **2004** ; 15(4):303-11.
- 576 38. John CC, Park GS, Sam-Agudu N, Opoka RO, Boivin MJ. Elevated serum levels of  
577 IL-1ra in children with Plasmodium falciparum malaria are associated with increased  
578 severity of disease. *Cytokine* **2008** ; 41(3):204-8.
- 579 39. Kumar R, Ng S, Engwerda C. The Role of IL-10 in Malaria: A Double Edged  
580 Sword. *Front Immunol* **2019** ; 10:229.
- 581 40. Dunst J, Kamena F, Matuschewski K. Cytokines and Chemokines in Cerebral  
582 Malaria Pathogenesis. *Front Cell Infect Microbiol* **2017** ; 7:324.
- 583 41. Hoffmann E, Dittrich-Breiholz O, Holtmann H, Kracht M. Multiple control of  
584 interleukin-8 gene expression. *J Leukoc Biol* **2002** ; 72(5):847-55.
- 585 42. Leoratti FM, Trevelin SC, Cunha FQ, et al. Neutrophil paralysis in Plasmodium  
586 vivax malaria. *PLoS Negl Trop Dis* **2012** ; 6(6):e1710.
- 587 43. Mahanta A, Kakati S, Baruah S. The association of IL-8-251T/A polymorphism  
588 with complicated malaria in Karbi Anglong district of Assam. *Cytokine* **2014** ; 65(2):210-  
589 6.

- 590 44. Berg A, Patel S, Gonca M, et al. Cytokine network in adults with falciparum  
591 Malaria and HIV-1: increased IL-8 and IP-10 levels are associated with disease severity.  
592 PLoS One **2014** ; 9(12):e114480.
- 593 45. Broxmeyer HE, Cooper S, Cacalano G, Hague NL, Bailish E, Moore MW.  
594 Involvement of Interleukin (IL) 8 receptor in negative regulation of myeloid progenitor  
595 cells in vivo: evidence from mice lacking the murine IL-8 receptor homologue. J Exp  
596 Med **1996** ; 184(5):1825-32.
- 597 46. Tsigotou P, Chondropoulos S, Frantzeskaki F, et al. Thrombocytopenia in  
598 critically ill patients with severe sepsis/septic shock: Prognostic value and association  
599 with a distinct serum cytokine profile. J Crit Care **2016** ; 32:9-15.
- 600 47. Bounameaux C, Boehlen F, Membre A, et al. Heparin-induced  
601 thrombocytopenia associated with interleukin-8-dependent platelet activation in a  
602 patient with antiphospholipid syndrome. Eur J Haematol **2007** ; 79(6):550-3.
- 603 48. Zhang W, Liu C, Wu D, et al. Decitabine improves platelet recovery by down-  
604 regulating IL-8 level in MDS/AML patients with thrombocytopenia. Blood Cells Mol Dis  
605 **2019** ; 76:66-71.
- 606 49. Ito Y, Correll K, Zemans RL, Leslie CC, Murphy RC, Mason RJ. Influenza induces  
607 IL-8 and GM-CSF secretion by human alveolar epithelial cells through HGF/c-Met and  
608 TGF- $\alpha$ /EGFR signaling. Am J Physiol Lung Cell Mol Physiol **2015** ; 308(11):L1178-88.
- 609 50. Zarnegar R, Michalopoulos GK. The many faces of hepatocyte growth factor:  
610 from hepatopoiesis to hematopoiesis. J Cell Biol **1995** ; 129(5):1177-80.
- 611 51. Lai L, Zeff RA, Goldschneider I. A recombinant single-chain IL-7/HGF $\beta$  hybrid  
612 cytokine induces juxtacrine interactions of the IL-7 and HGF (c-Met) receptors and

613 stimulates the proliferation of CFU-S12, CLPs, and pre-pro-B cells. *Blood* **2006** ;  
614 107(5):1776-84.

615 52. Kisia LE, Kempaiah P, Anyona SB, et al. Genetic variation in interleukin-7 is  
616 associated with a reduced erythropoietic response in Kenyan children infected with  
617 *Plasmodium falciparum*. *BMC Med Genet* **2019** ; 20(1):140.

618 53. Garavelli S, De Rosa V, de Candia P. The Multifaceted Interface Between  
619 Cytokines and microRNAs: An Ancient Mechanism to Regulate the Good and the Bad of  
620 Inflammation. *Front Immunol* **2018** ; 9:3012.

621 54. Pordzik J, Piszczak K, De Rosa S, et al. The Potential Role of Platelet-Related  
622 microRNAs in the Development of Cardiovascular Events in High-Risk Populations,  
623 Including Diabetic Patients: A Review. *Front Endocrinol (Lausanne)* **2018** ; 9:74.

624 55. Garcia A, Dunoyer-Geindre S, Zapilko V, Nolli S, Reny JL, Fontana P. Functional  
625 Validation of microRNA-126-3p as a Platelet Reactivity Regulator Using Human  
626 Haematopoietic Stem Cells. *Thromb Haemost* **2019** ; 119(2):254-63.

627 56. Campos FM, Franklin BS, Teixeira-Carvalho A, et al. Augmented plasma  
628 microparticles during acute *Plasmodium vivax* infection. *Malar J* **2010** ; 9:327.

629 57. Franklin BS, Vitorino BL, Coelho HC, et al. Plasma circulating nucleic acids levels  
630 increase according to the morbidity of *Plasmodium vivax* malaria. *PLoS One* **2011** ;  
631 6(5):e19842.

632 58. Milovanovic J, Arsenijevic A, Stojanovic B, et al. Interleukin-17 in Chronic  
633 Inflammatory Neurological Diseases. *Front Immunol* **2020** ; 11:947.

634

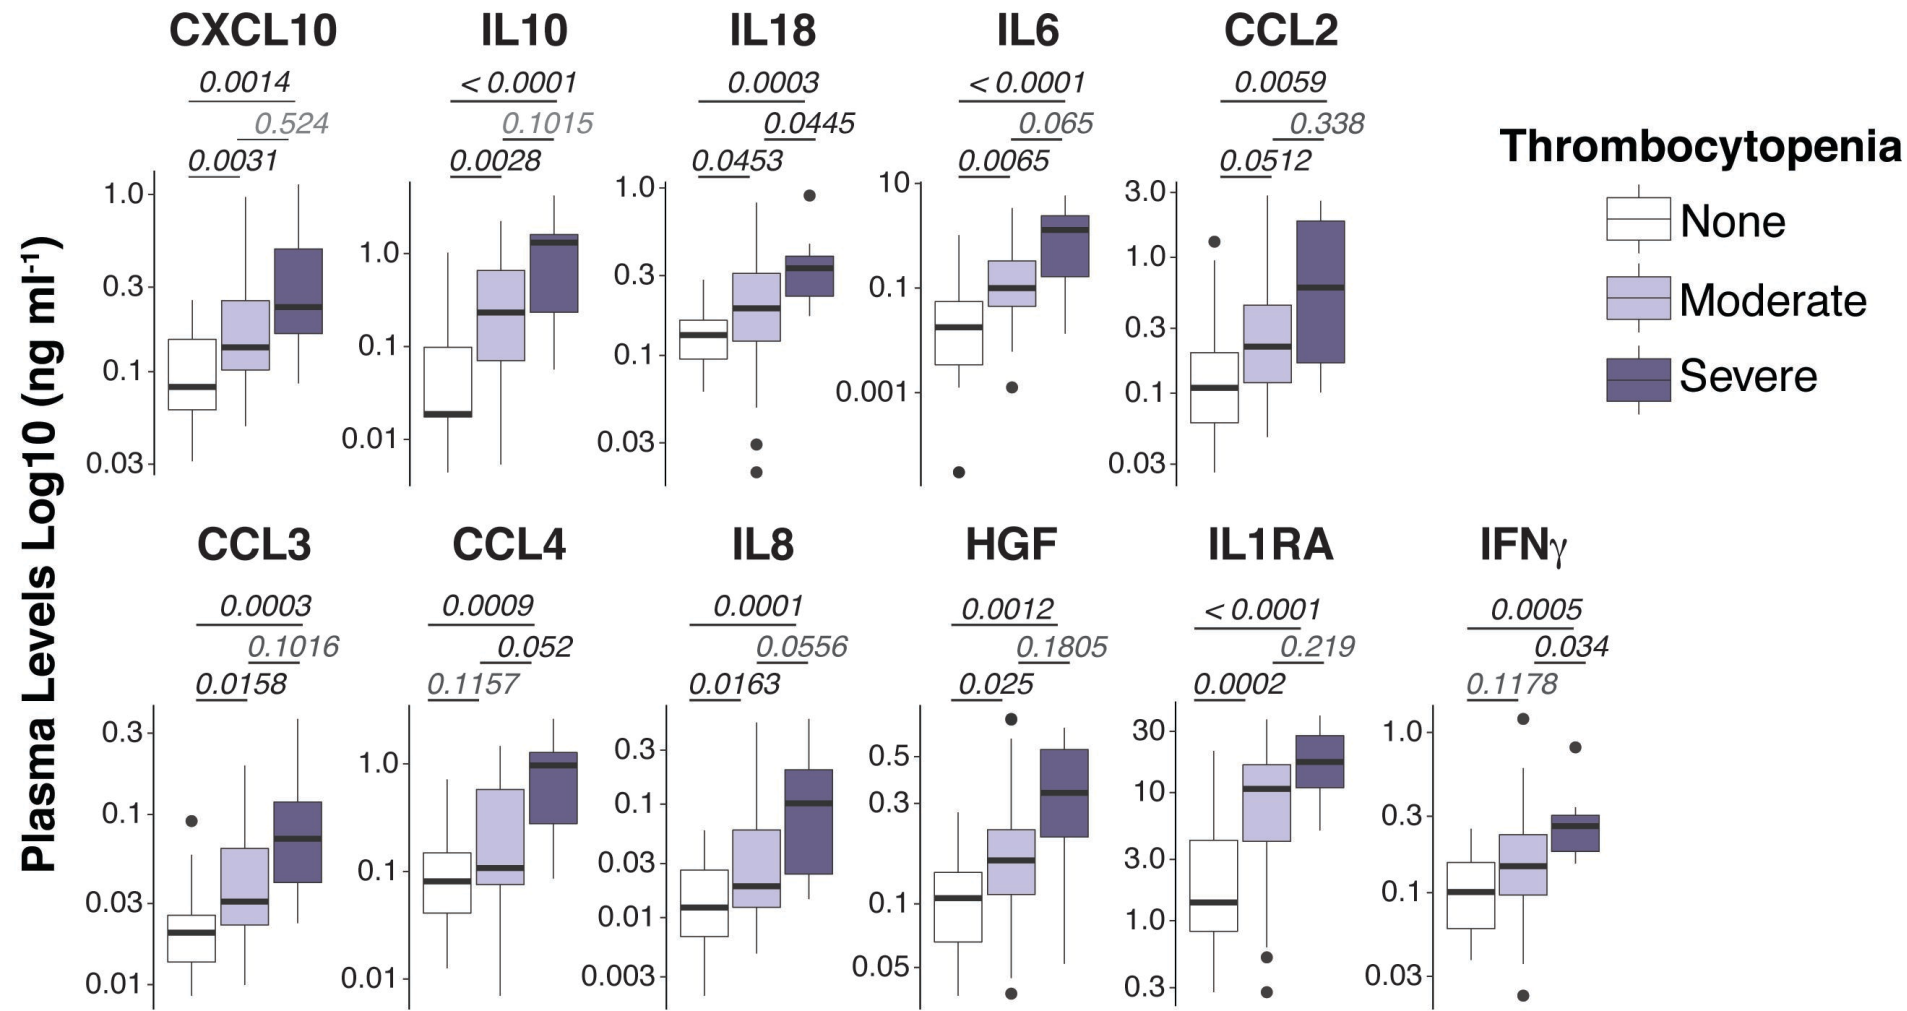

**A**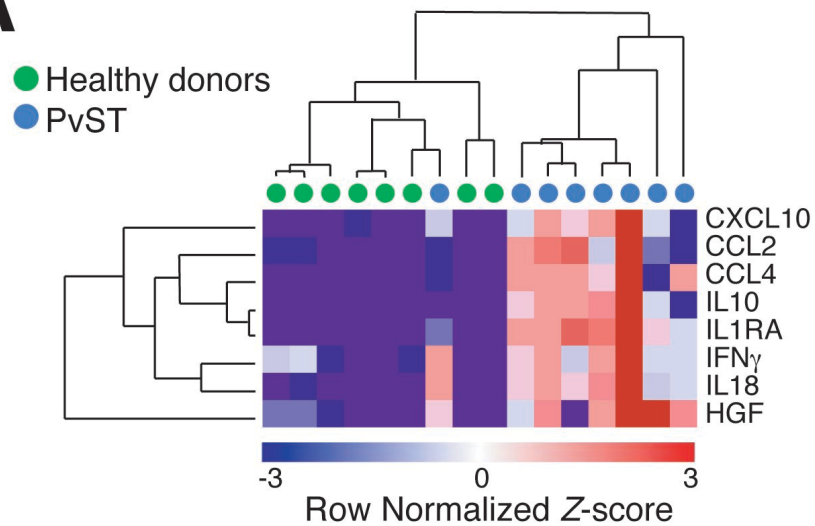**B**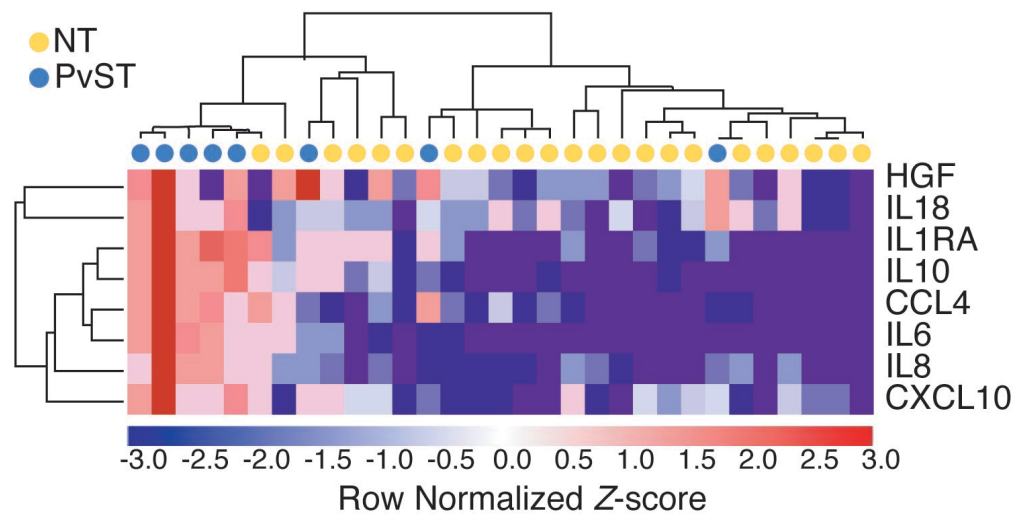**C**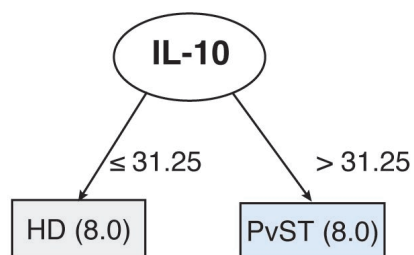

| FULL | LOOCV  |
|------|--------|
| 100% | 93.75% |

**D**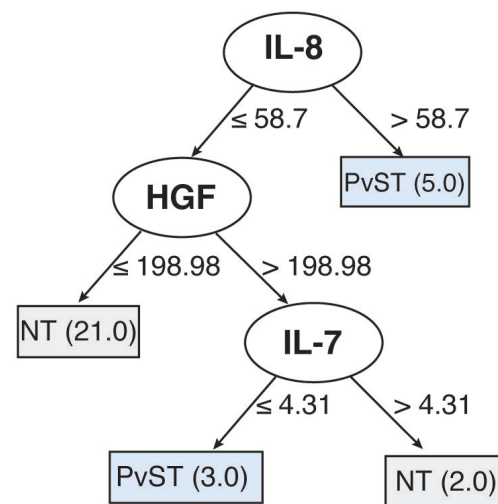

| FULL | LOOCV  |
|------|--------|
| 100% | 74.19% |

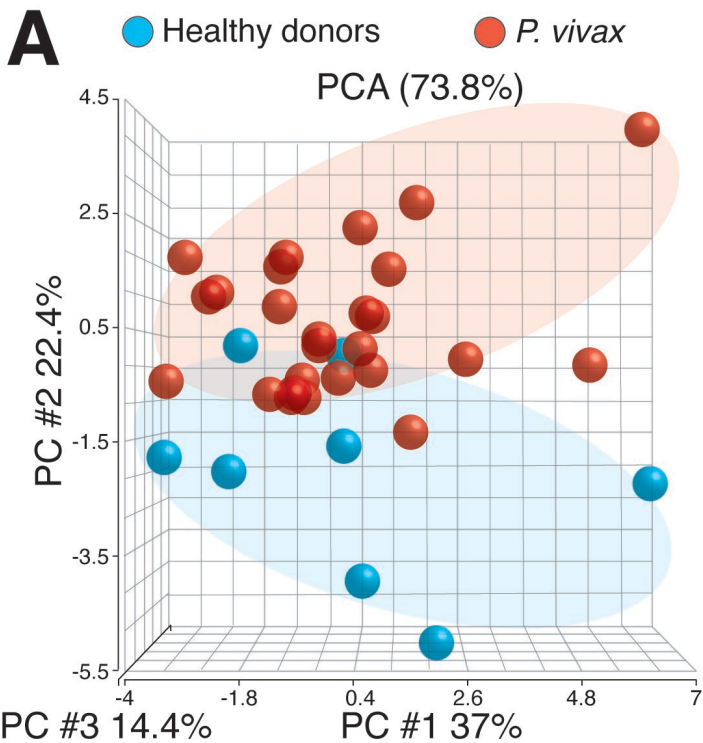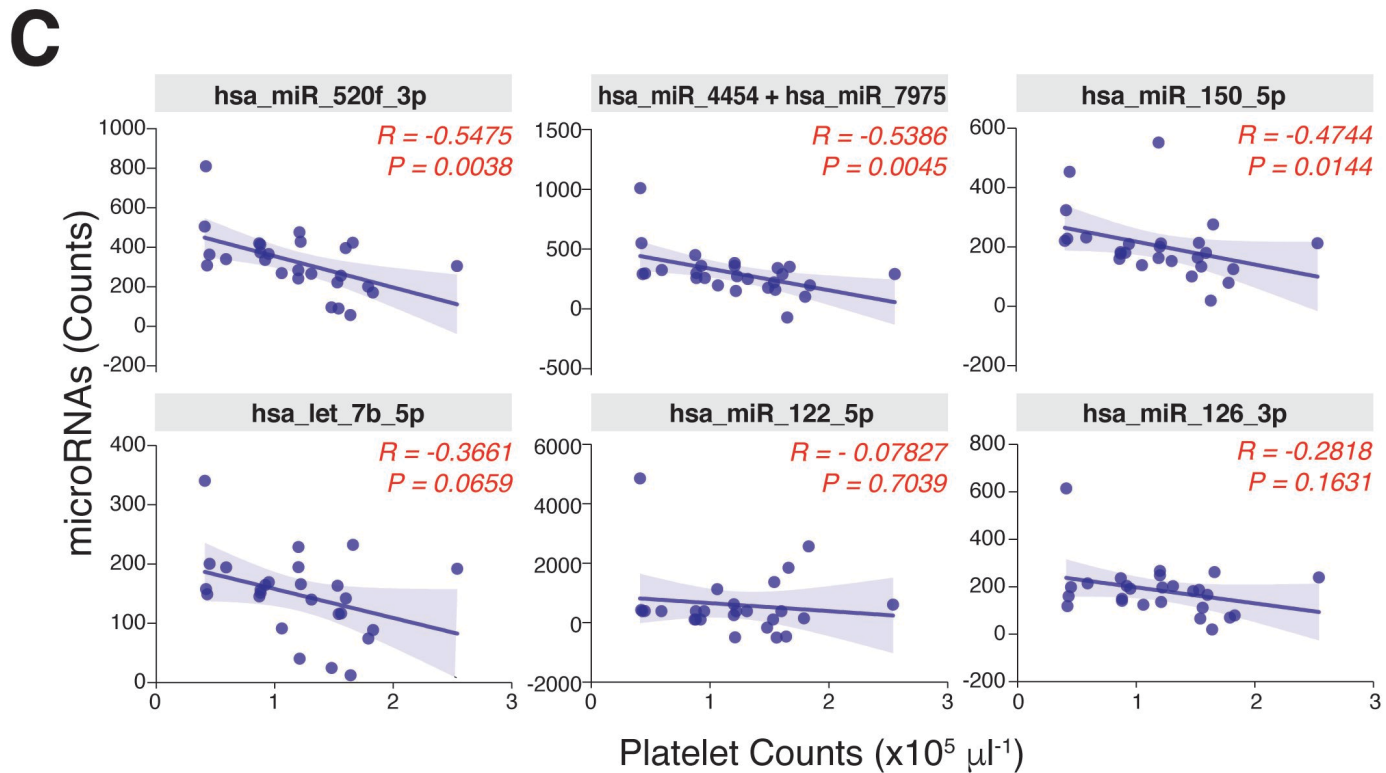**B**

| miRNAs                      | <i>P. vivax</i><br>v.s.<br>Control |        | <i>P. vivax</i>     |       |                 |       |
|-----------------------------|------------------------------------|--------|---------------------|-------|-----------------|-------|
|                             |                                    |        | Severe vs. Moderate |       | Severe vs. None |       |
|                             | P value                            | FC     | P value             | FC    | P value         | FC    |
| hsa-miR-520f-3p             | <b>0.00339</b>                     | -1,614 | <b>0.0466</b>       | 1,497 | <b>0.00403</b>  | 2,105 |
| hsa-miR-4454 + hsa-miR-7975 | <b>0.0434</b>                      | 1,957  | <b>0.00606</b>      | 1,862 | <b>0.000881</b> | 2,563 |
| hsa-miR-150-5p              | <b>0.029</b>                       | -1,536 | 0.126               | 1,496 | <b>0.0348</b>   | 1,961 |
| hsa-let-7b-5p               | <b>0.000304</b>                    | -2,055 | 0.216               | 1,475 | 0.143           | 1,676 |
| hsa-miR-122-5p              | 0.24                               | 4,575  | <b>0.0276</b>       | 5,449 | 0.144           | 2,245 |
| hsa-miR-126-3p              | 0.701                              | -1,09  | 0.168               | 1,421 | <b>0.0281</b>   | 2,041 |

**A**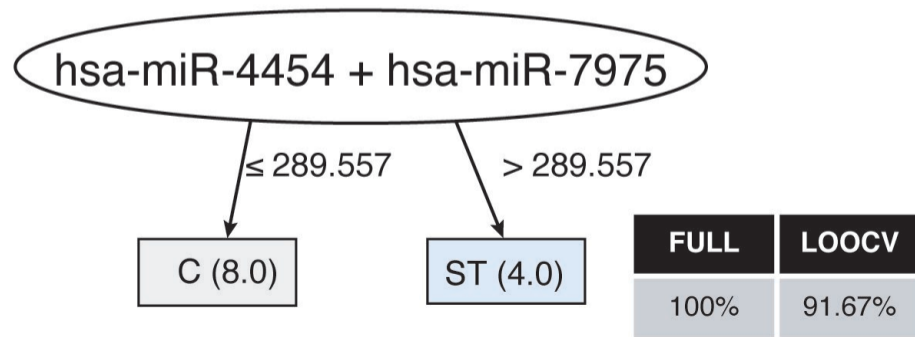**B**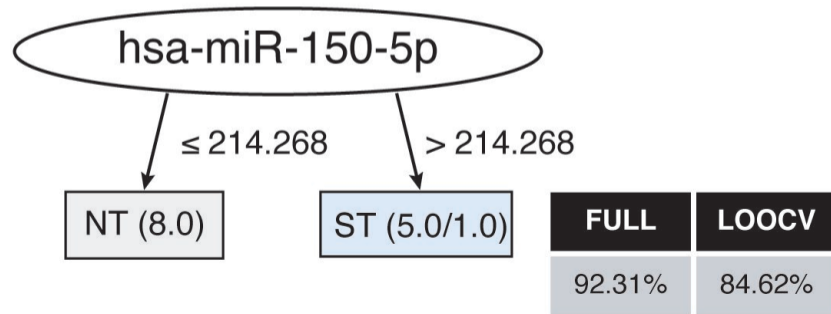

Source: https://www.biorxiv.org/content/10.1101/2020.08.20.260463v1.full.pdf
